# Supplementary material for: [Retracted] Understanding the Critical Role of Glycolysis‐Related lncRNAs in Lung Adenocarcinoma Based on Three Molecular Subtypes
Source: Hindawi journal article supplement (doi:10.1155/2022/7587398), 2022-01-01
Supplement: f6 [file 7587398.f6.pdf]

| Tag    | F. value | p. value | effect. size |
|--------|----------|----------|--------------|
| AR     | 6.9      | 0.00111  | 0.027831     |
| BACH1  | 13.1     | 2.94E-06 | 0.051481     |
| CEBPA  | 11.1     | 1.86E-05 | 0.044197     |
| CEBPB  | 2.59     | 0.076    | 0.010636     |
| CREB1  | 9.67     | 7.66E-05 | 0.038558     |
| CTCF   | 7.17     | 0.000854 | 0.028892     |
| E2F1   | 48.1     | 8.73E-20 | 0.166477     |
| E2F4   | 72.4     | 3.26E-28 | 0.230968     |
| EGR1   | 20.4     | 3.18E-09 | 0.077978     |
| ELK1   | 2.94     | 0.0537   | 0.012058     |
| ESR1   | 24.4     | 8.25E-11 | 0.091844     |
| ETS1   | 29.1     | 1.22E-12 | 0.107589     |
| ETS2   | 13.3     | 2.45E-06 | 0.052201     |
| FOS    | 43       | 6.59E-18 | 0.151388     |
| FOXA1  | 0.0473   | 0.954    | 0.000196     |
| FOXM1  | 52.4     | 2.64E-21 | 0.178492     |
| FOXO1  | 51.9     | 3.93E-21 | 0.177132     |
| FOXO3  | 40.9     | 3.79E-17 | 0.145201     |
| FOXP1  | 36.8     | 1.36E-15 | 0.132411     |
| GATA2  | 99.2     | 8.31E-37 | 0.291582     |
| GATA3  | 45.9     | 5.73E-19 | 0.159945     |
| HIF1A  | 43.8     | 3.20E-18 | 0.153923     |
| HNF1A  | 5.39     | 0.00486  | 0.021859     |
| HNF4A  | 1.04     | 0.354    | 0.004304     |
| IRF1   | 10.4     | 3.68E-05 | 0.041478     |
| JUN    | 38       | 4.64E-16 | 0.136272     |
| MITF   | 51.2     | 7.14E-21 | 0.175093     |
| MYB    | 4.04     | 0.0183   | 0.016473     |
| MYC    | 56       | 1.41E-22 | 0.188418     |
| NFIC   | 7.02     | 0.000987 | 0.02831      |
| NFKB1  | 17.7     | 3.67E-08 | 0.068573     |
| POU2F1 | 8.99     | 0.000147 | 0.035967     |
| PPARA  | 1.63     | 0.198    | 0.006704     |
| PPARG  | 12.3     | 5.94E-06 | 0.048705     |
| PRDM14 | 22.5     | 4.61E-10 | 0.085341     |
| RARA   | 15.1     | 4.23E-07 | 0.059082     |
| RELA   | 12.2     | 7.04E-06 | 0.048033     |
| SMAD3  | 16.4     | 1.32E-07 | 0.063607     |
| SMAD4  | 12.6     | 4.60E-06 | 0.049717     |
| SP1    | 50.2     | 1.57E-20 | 0.172392     |
| SP3    | 14.7     | 6.30E-07 | 0.05752      |
| SPI1   | 55.9     | 1.47E-22 | 0.188282     |
| STAT1  | 6.59     | 0.0015   | 0.02663      |
| STAT2  | 1.34     | 0.264    | 0.005519     |
| STAT3  | 8.56     | 0.000222 | 0.034299     |
| TFAP2A | 18.9     | 1.29E-08 | 0.072592     |
| TP53   | 31       | 2.15E-13 | 0.113987     |
| USF1   | 10.2     | 4.54E-05 | 0.040644     |
| USF2   | 7.44     | 0.000659 | 0.029936     |
| WT1    | 20.7     | 2.38E-09 | 0.079092     |
| YY1    | 11       | 2.14E-05 | 0.043638     |
| ZNF263 | 21.6     | 1.01E-09 | 0.082363     |

| Tag    | F. value | p. value | effect. size |
|--------|----------|----------|--------------|
| AR     | 35.5     | 7.28E-15 | 0.156326     |
| CEBPA  | 1.49     | 0.226    | 0.007742     |
| CEBPB  | 8.9      | 0.000166 | 0.044428     |
| CREB1  | 3.25     | 0.0398   | 0.016695     |
| CTCF   | 26.1     | 2.40E-11 | 0.119872     |
| E2F1   | 65.5     | 3.34E-25 | 0.254952     |
| E2F4   | 84.6     | 3.80E-31 | 0.306343     |
| EGR1   | 14.9     | 5.77E-07 | 0.072271     |
| ELK1   | 1.32     | 0.269    | 0.006841     |
| ESR1   | 7.56     | 0.000605 | 0.037956     |
| ETS1   | 28.6     | 2.61E-12 | 0.130017     |
| ETS2   | 22.4     | 6.45E-10 | 0.104615     |
| FOS    | 14.8     | 6.34E-07 | 0.07181      |
| FOXA1  | 9.41     | 0.000102 | 0.04686      |
| FOXM1  | 86.9     | 7.52E-32 | 0.312181     |
| FOXO1  | 38.7     | 4.97E-16 | 0.168074     |
| FOXO3  | 25.3     | 4.70E-11 | 0.11678      |
| FOXP1  | 46.6     | 7.48E-19 | 0.195831     |
| GATA2  | 55.8     | 5.60E-22 | 0.225493     |
| GATA3  | 47       | 5.66E-19 | 0.197        |
| HIF1A  | 23.6     | 2.25E-10 | 0.10953      |
| HNF4A  | 14.6     | 7.83E-07 | 0.070788     |
| IRF1   | 43.3     | 1.08E-17 | 0.184543     |
| JUN    | 15.3     | 4.10E-07 | 0.073919     |
| MITF   | 41.4     | 5.48E-17 | 0.177598     |
| MYC    | 51.4     | 1.62E-20 | 0.211763     |
| NFIC   | 13.1     | 3.11E-06 | 0.064081     |
| NFKB1  | 28       | 4.43E-12 | 0.12761      |
| POU2F1 | 13.2     | 3.00E-06 | 0.064257     |
| PPARA  | 17.7     | 4.52E-08 | 0.084526     |
| PPARG  | 23.4     | 2.49E-10 | 0.109052     |
| PRDM14 | 21.1     | 2.09E-09 | 0.099114     |
| RARA   | 3.8      | 0.0232   | 0.019455     |
| RELA   | 23.2     | 3.20E-10 | 0.107892     |
| SMAD3  | 12.4     | 6.11E-06 | 0.060769     |
| SMAD4  | 1.53     | 0.218    | 0.007934     |
| SP1    | 9.75     | 7.41E-05 | 0.048448     |
| SP3    | 6.05     | 0.00259  | 0.030615     |
| SPI1   | 62.6     | 2.97E-24 | 0.246402     |
| STAT1  | 39.3     | 3.02E-16 | 0.170236     |
| STAT2  | 23.3     | 2.70E-10 | 0.108679     |
| STAT3  | 9.36     | 0.000107 | 0.04662      |
| TFAP2A | 10.7     | 2.89E-05 | 0.053114     |
| TP53   | 12.3     | 6.48E-06 | 0.060481     |
| USF1   | 34.6     | 1.58E-14 | 0.152904     |
| USF2   | 16.9     | 9.07E-08 | 0.081193     |
| WT1    | 17.5     | 5.11E-08 | 0.083938     |
| YY1    | 33.6     | 3.49E-14 | 0.149398     |
| ZNF263 | 12.7     | 4.54E-06 | 0.062227     |

| Tag    | F. value | p. value | effect. size |
|--------|----------|----------|--------------|
| AR     | 0.85     | 0.429    | 0.007564     |
| BACH1  | 31.4     | 9.60E-13 | 0.219779     |
| CEBPA  | 1.88     | 0.155    | 0.016597     |
| CEBPB  | 0.282    | 0.754    | 0.002527     |
| CREB1  | 6.81     | 0.00134  | 0.057575     |
| CTCF   | 9.07     | 0.000163 | 0.075256     |
| E2F1   | 68.1     | 8.22E-24 | 0.379188     |
| E2F4   | 97.5     | 3.81E-31 | 0.466436     |
| EGR1   | 1.9      | 0.152    | 0.016753     |
| ELK1   | 5.71     | 0.00383  | 0.048683     |
| ESR1   | 1.28     | 0.279    | 0.011382     |
| ETS1   | 10.5     | 4.21E-05 | 0.086395     |
| ETS2   | 2.03     | 0.133    | 0.017911     |
| FOS    | 8.39     | 0.000308 | 0.069957     |
| FOXA1  | 1.34     | 0.263    | 0.011901     |
| FOXM1  | 46.1     | 1.72E-17 | 0.292626     |
| FOXO1  | 80.6     | 4.65E-27 | 0.419456     |
| FOXO3  | 50.2     | 1.02E-18 | 0.310347     |
| FOXP1  | 113      | 1.07E-34 | 0.504191     |
| GATA2  | 75.5     | 9.03E-26 | 0.403804     |
| GATA3  | 46.5     | 1.36E-17 | 0.294125     |
| HIF1A  | 16       | 3.21E-07 | 0.125494     |
| HNF4A  | 11.5     | 1.69E-05 | 0.093842     |
| IRF1   | 4.69     | 0.0101   | 0.040346     |
| JUN    | 10.8     | 3.46E-05 | 0.08801      |
| MITF   | 54.7     | 4.54E-20 | 0.329309     |
| MYB    | 0.578    | 0.562    | 0.005154     |
| MYC    | 66.2     | 2.72E-23 | 0.372495     |
| NFIC   | 14.2     | 1.57E-06 | 0.11294      |
| NFKB1  | 0.757    | 0.47     | 0.006744     |
| POU2F1 | 2.69     | 0.0701   | 0.023552     |
| PPARA  | 5.12     | 0.00668  | 0.043921     |
| PPARG  | 20.4     | 7.54E-09 | 0.15443      |
| PRDM14 | 41.6     | 4.39E-16 | 0.271772     |
| RARA   | 0.148    | 0.862    | 0.001326     |
| RELA   | 0.197    | 0.821    | 0.001763     |
| SMAD3  | 6.06     | 0.00274  | 0.051526     |
| SMAD4  | 2.41     | 0.0921   | 0.021165     |
| SP1    | 15.2     | 6.75E-07 | 0.119642     |
| SP3    | 0.726    | 0.485    | 0.006471     |
| SPI1   | 5.9      | 0.00317  | 0.050289     |
| STAT1  | 5.1      | 0.00681  | 0.043757     |
| STAT2  | 27.5     | 2.20E-11 | 0.197569     |
| STAT3  | 1.8      | 0.167    | 0.015898     |
| TFAP2A | 1.06     | 0.348    | 0.009421     |
| TP53   | 4.19     | 0.0163   | 0.036221     |
| USF1   | 0.458    | 0.633    | 0.004095     |
| USF2   | 0.656    | 0.52     | 0.005851     |
| WT1    | 1.93     | 0.148    | 0.017015     |
| YY1    | 3.65     | 0.0276   | 0.031687     |
| ZNF263 | 18.3     | 4.47E-08 | 0.140826     |
