# Supplementary figures and images for: [Retracted] Understanding the Critical Role of Glycolysis‐Related lncRNAs in Lung Adenocarcinoma Based on Three Molecular Subtypes
Source: Hindawi journal article supplement (doi:10.1155/2022/7587398), 2022-01-01

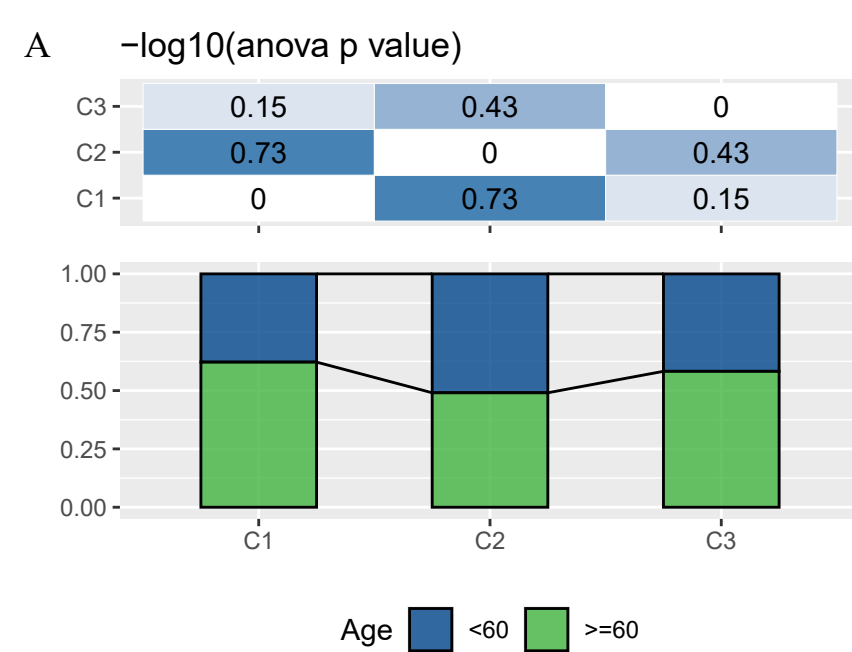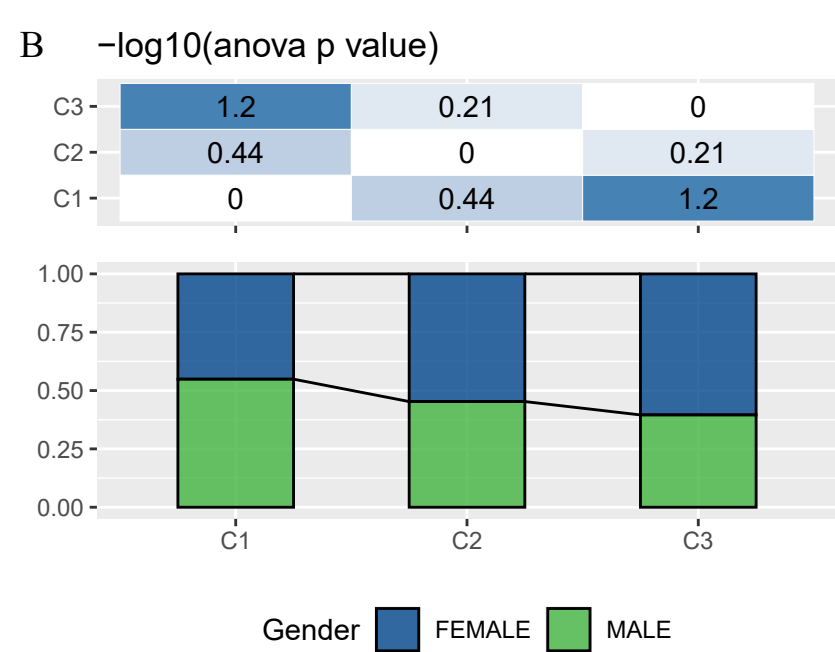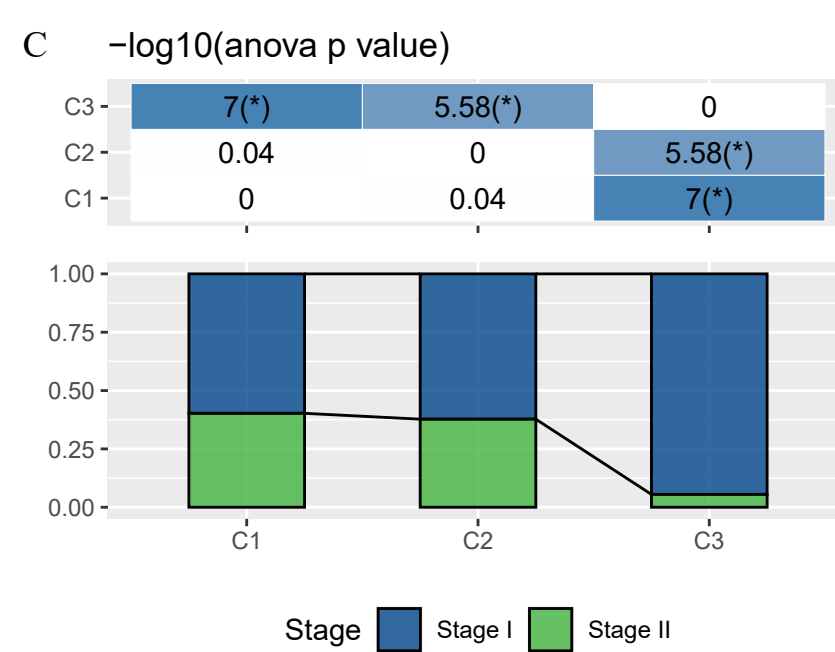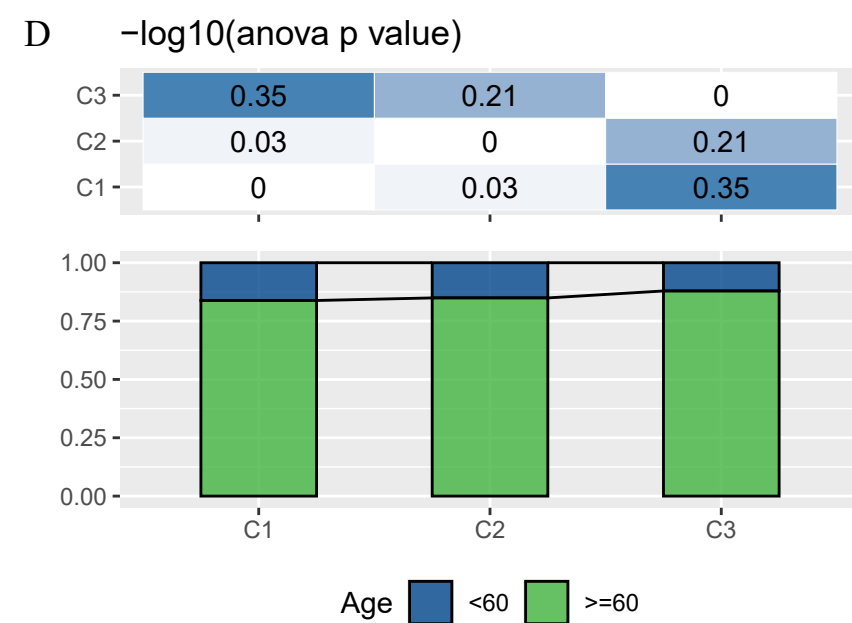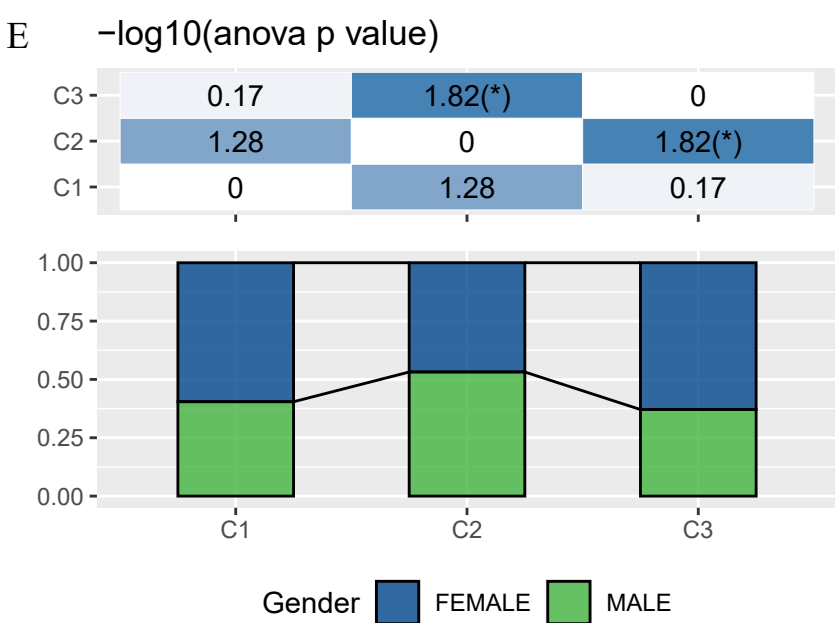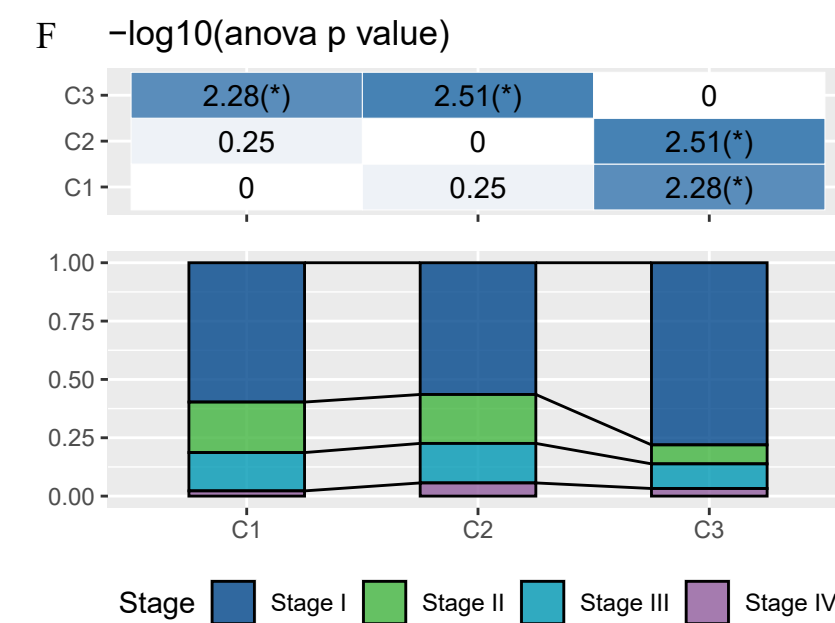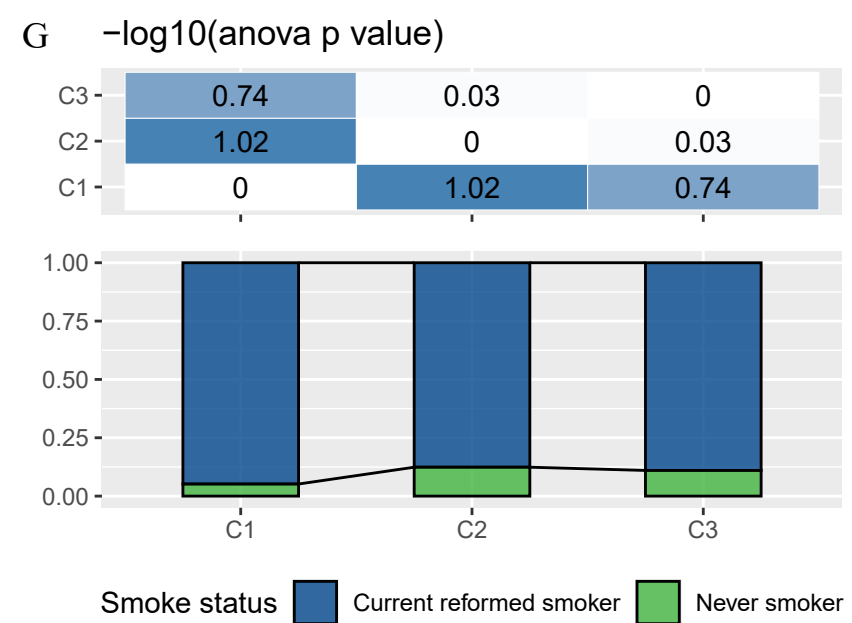

Supplement: f1 [file 7587398.f1.pdf]

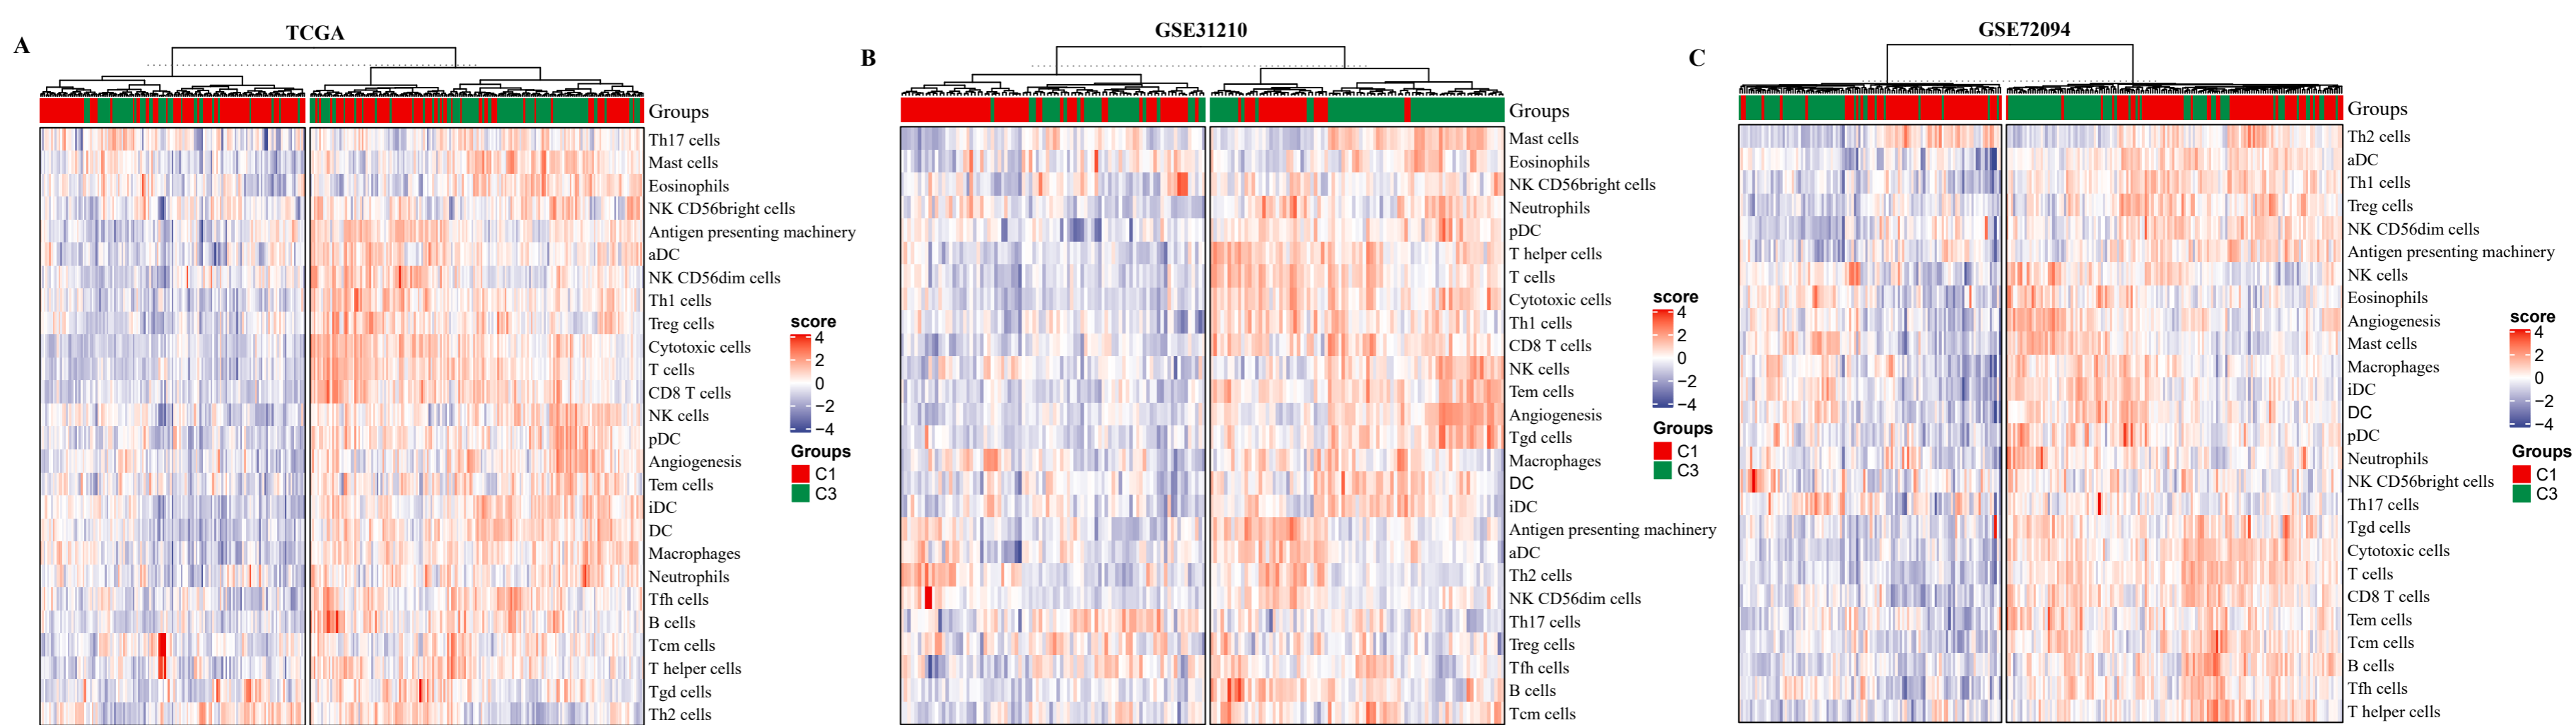

Supplement: f3 [file 7587398.f3.pdf]

category C1 C2 C3

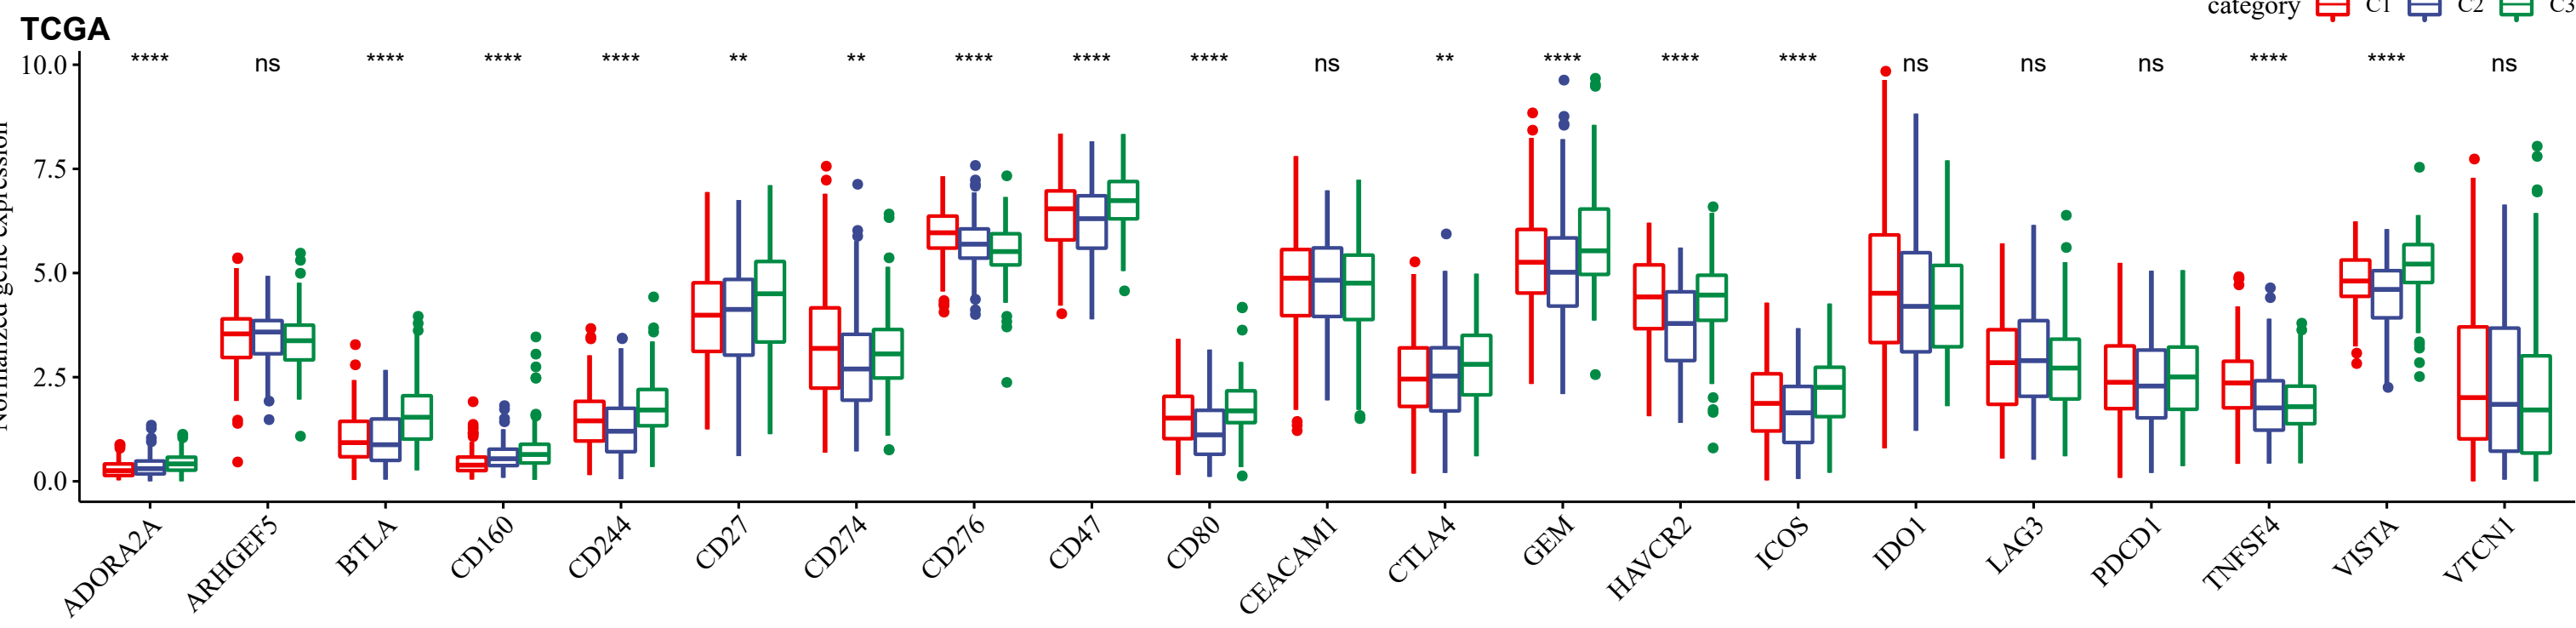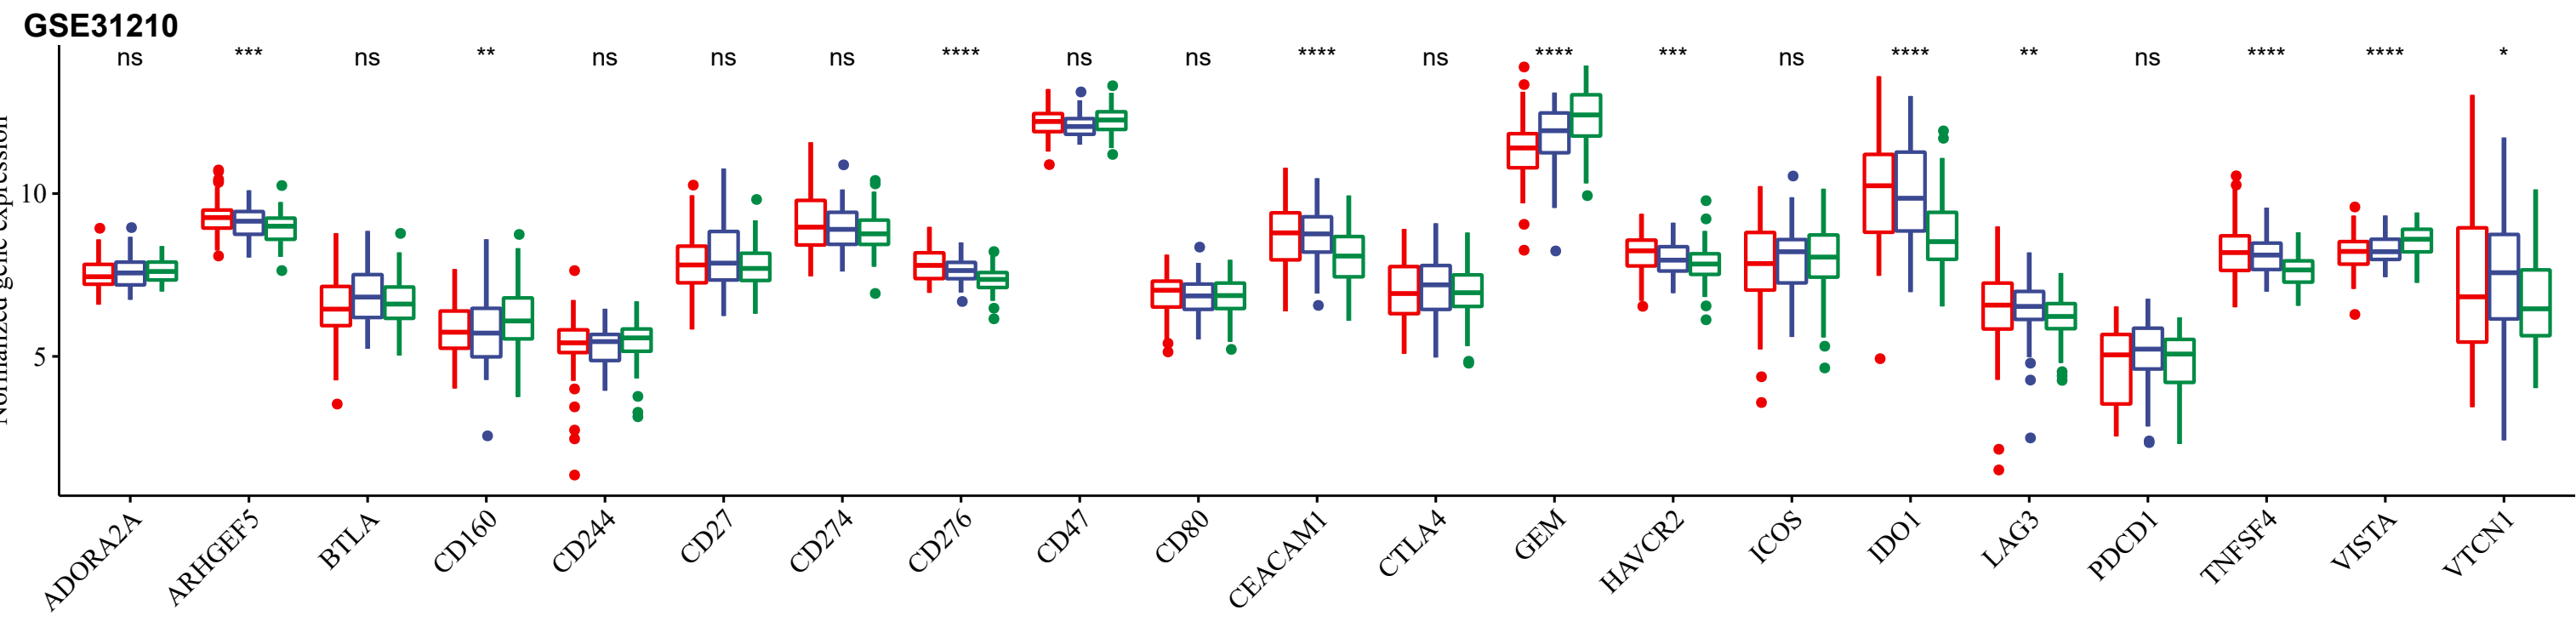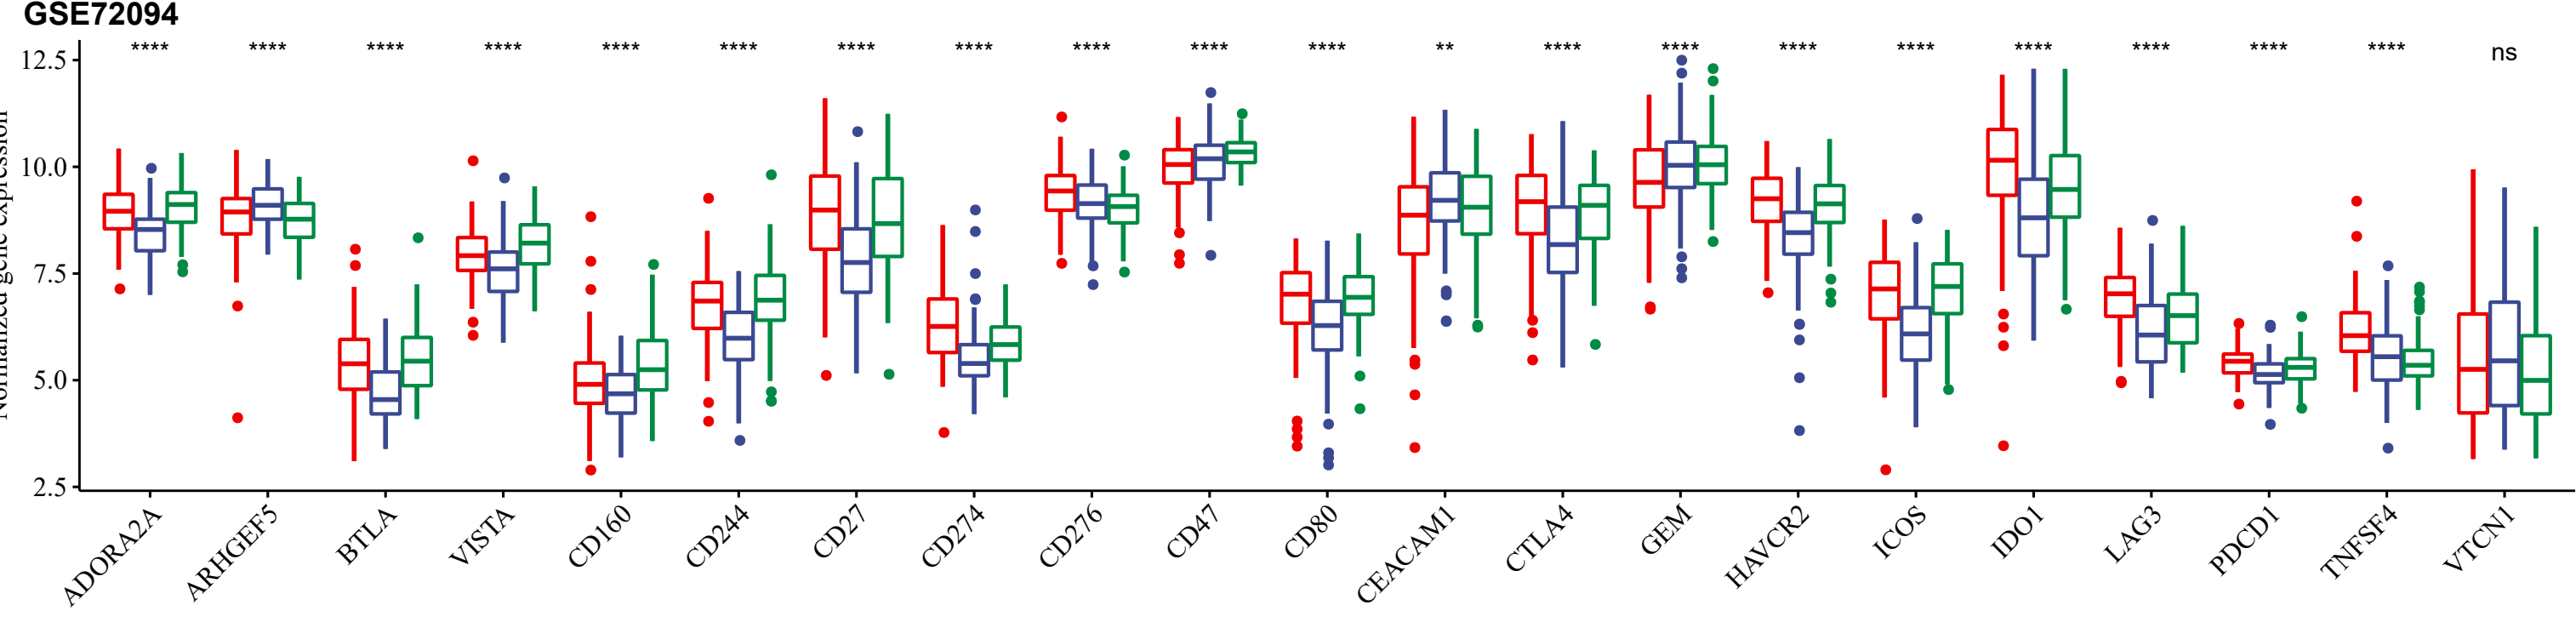

Supplement: f4 [file 7587398.f4.pdf]

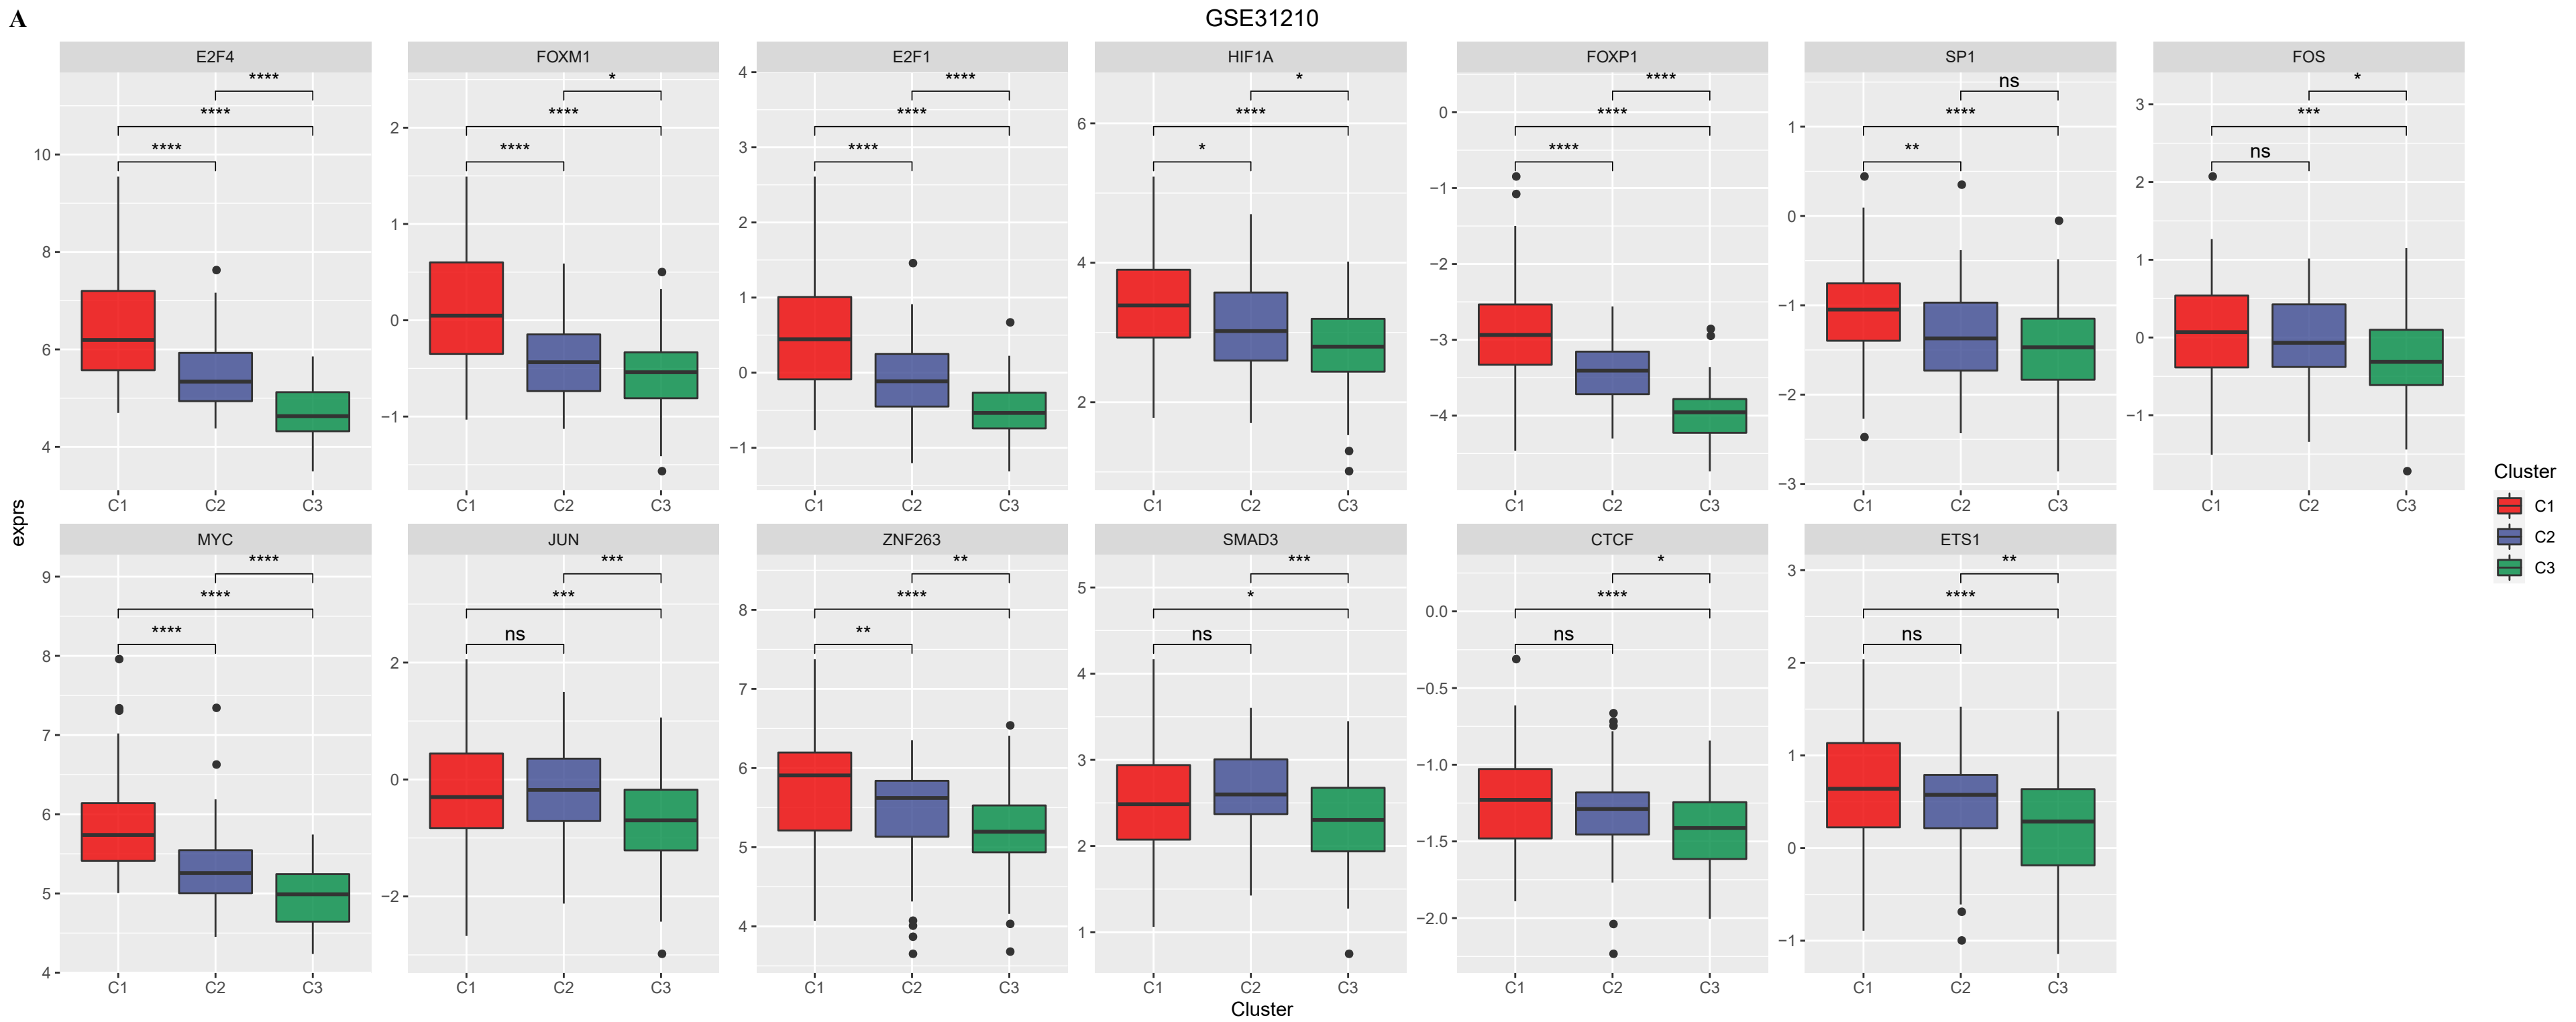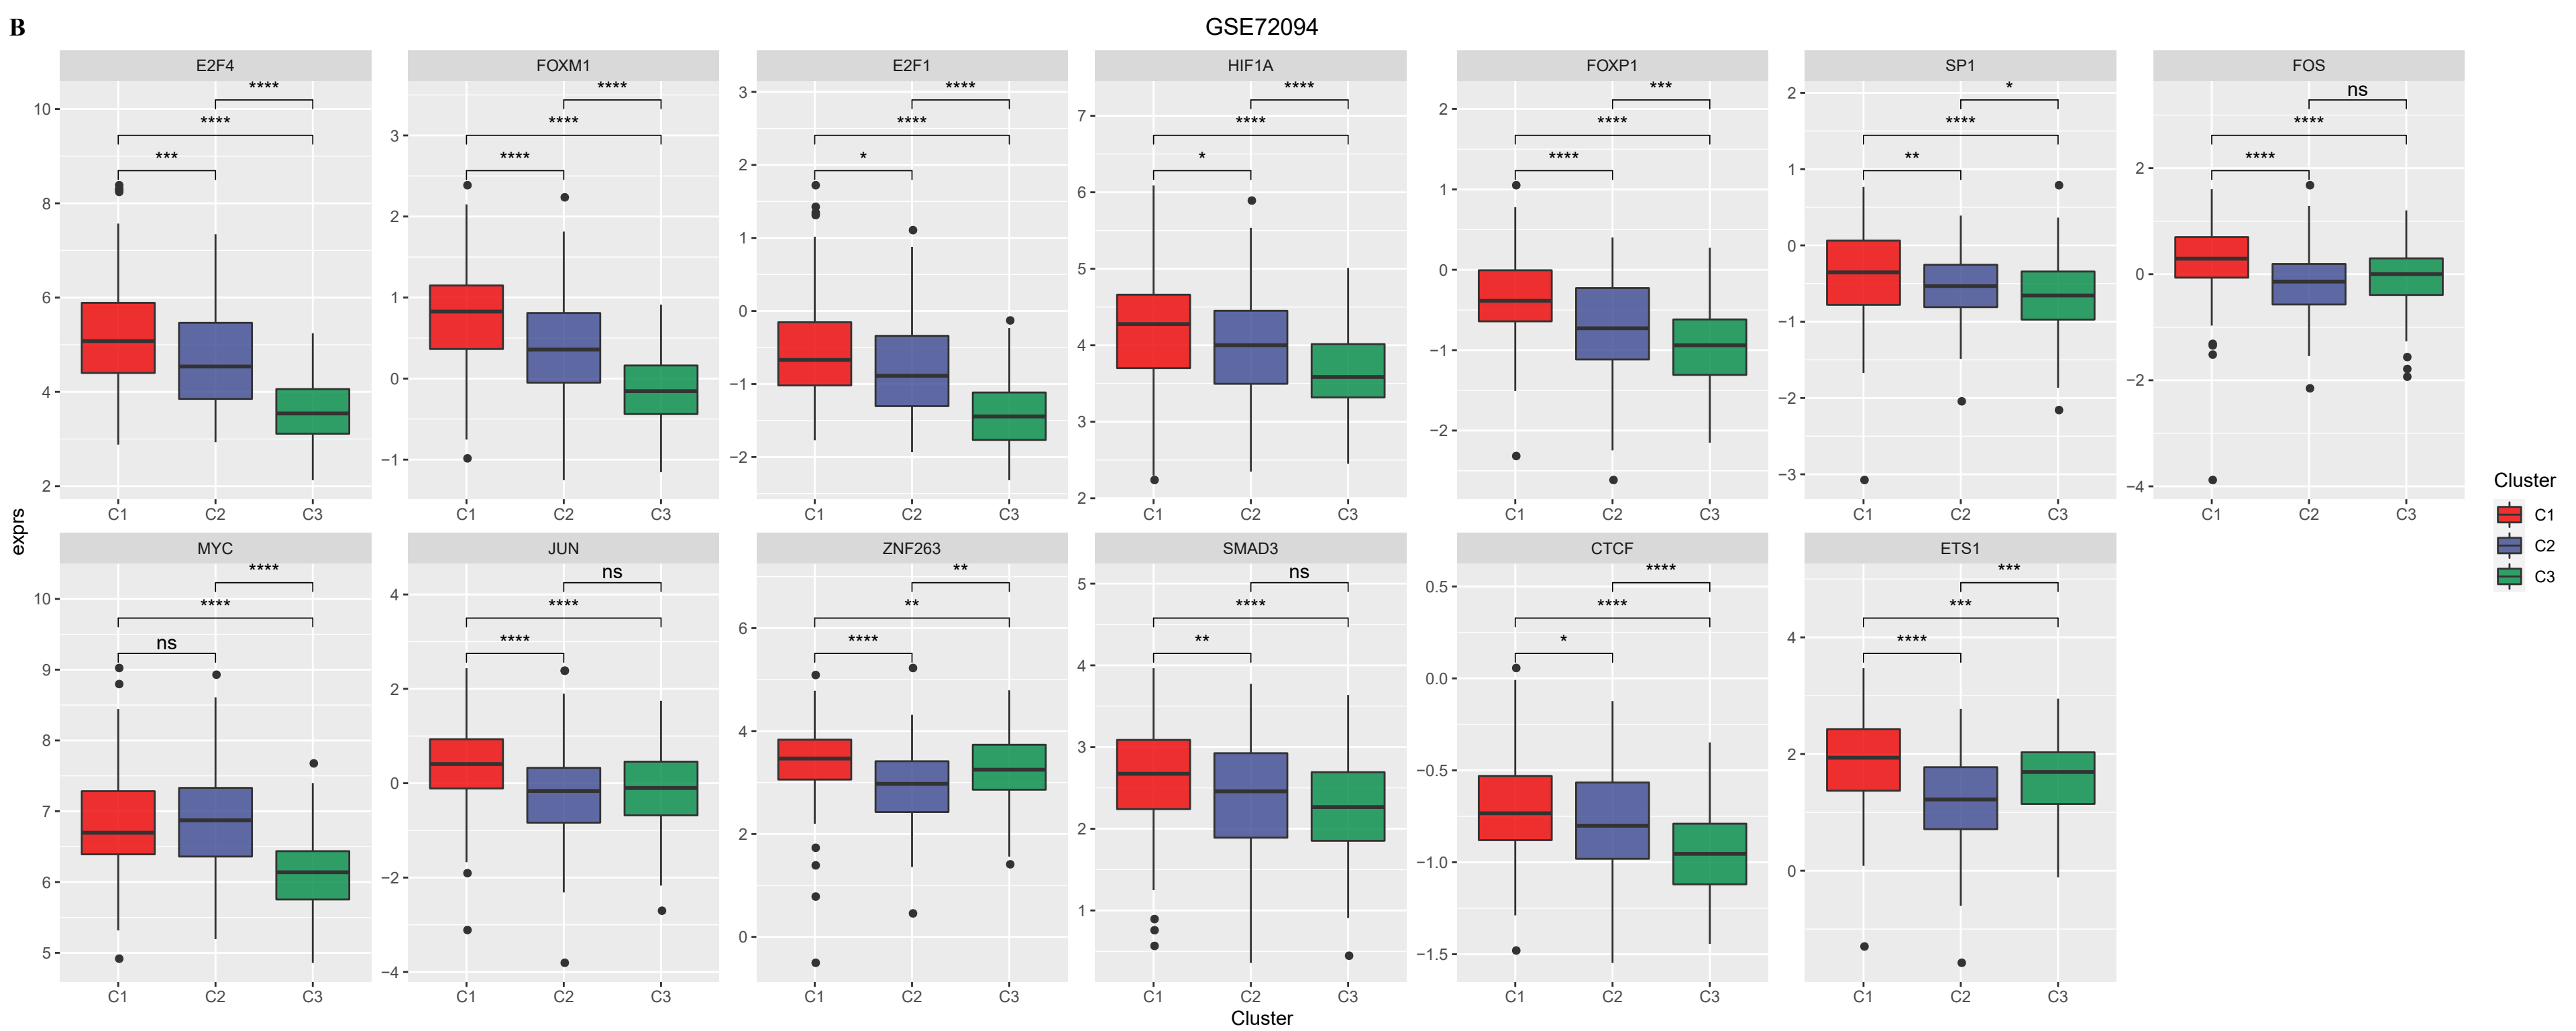

Supplement: f7 [file 7587398.f7.pdf]

Sample Type █ Normal █ Tumor

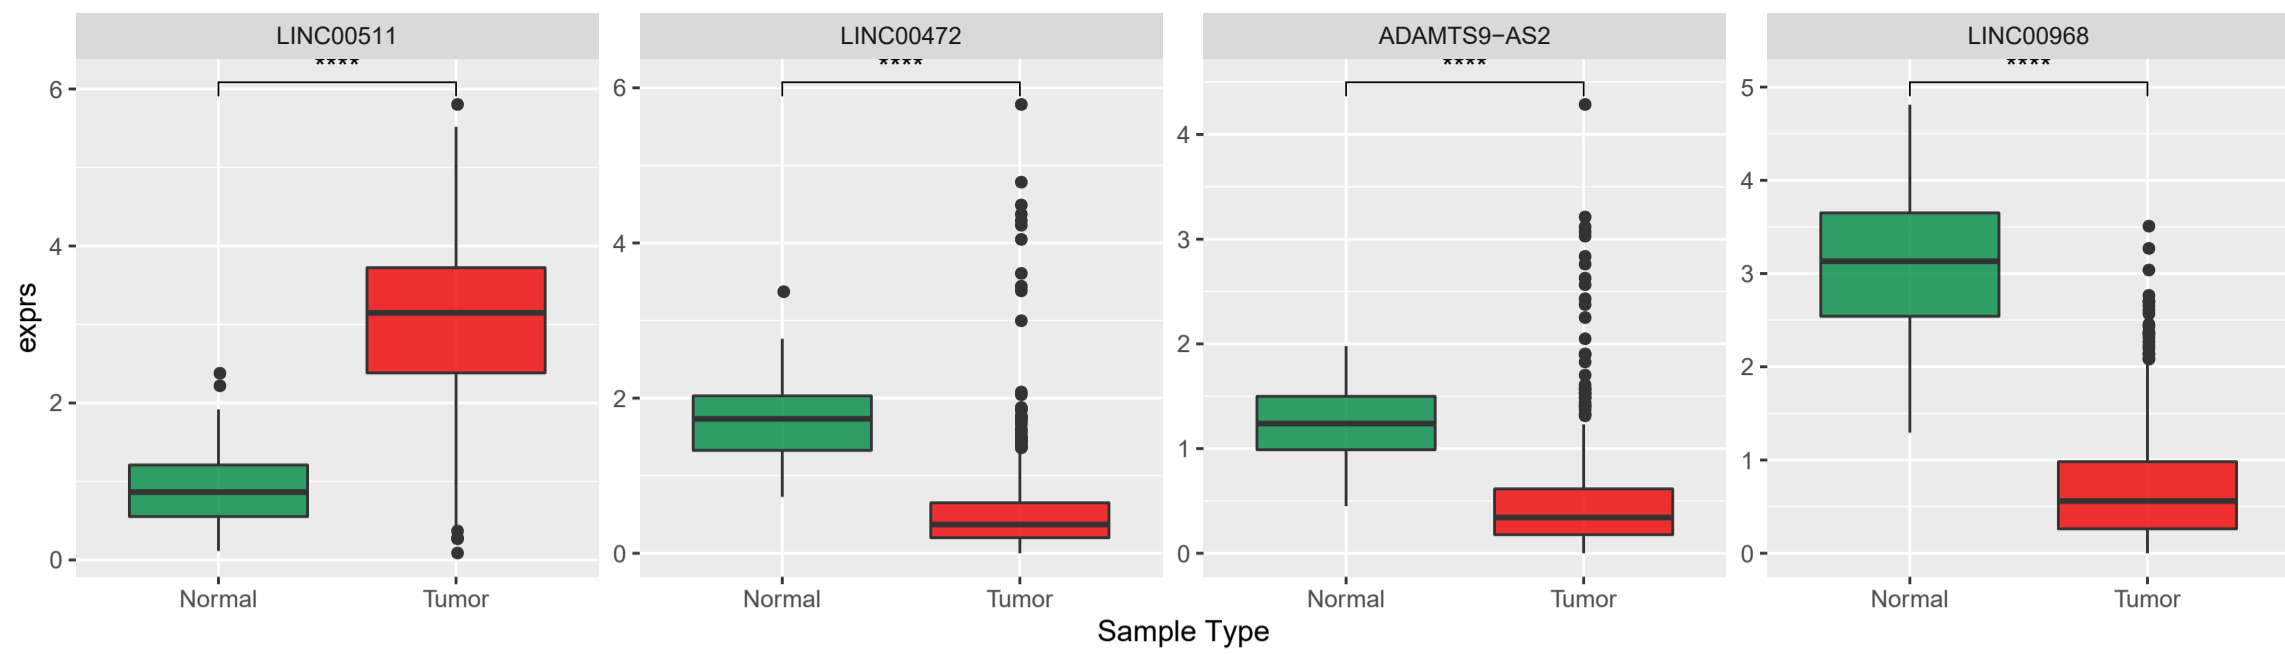

**B TCGA**

Cluster █ C1 █ C2 █ C3

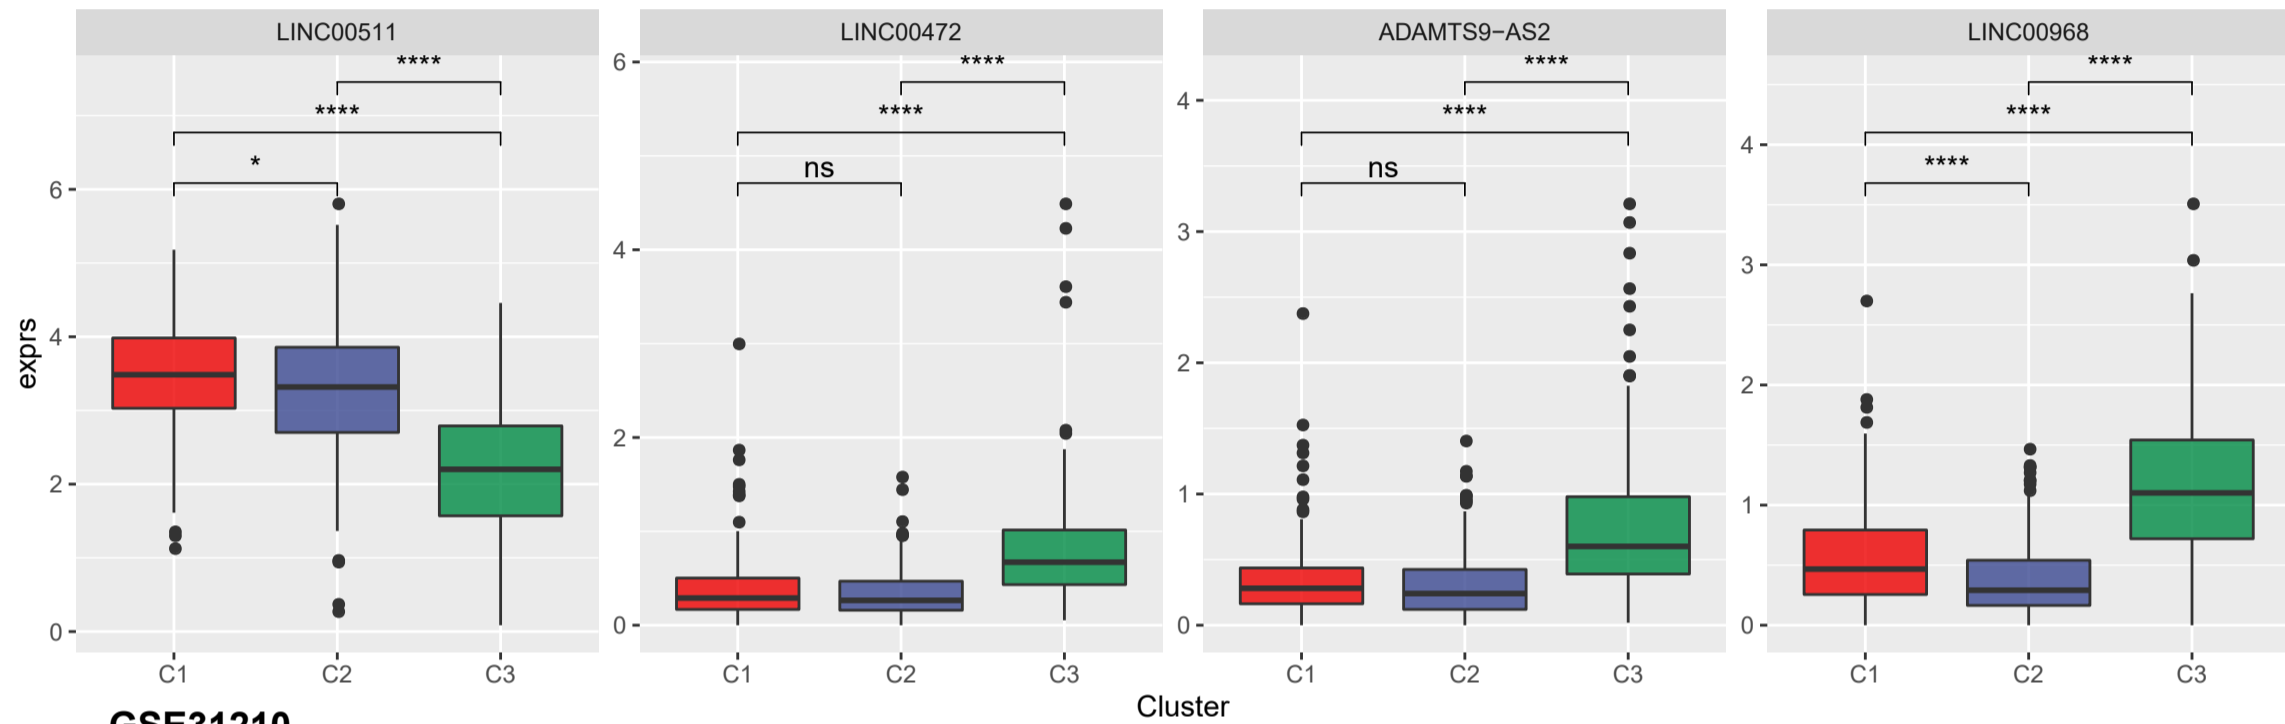

**GSE31210**

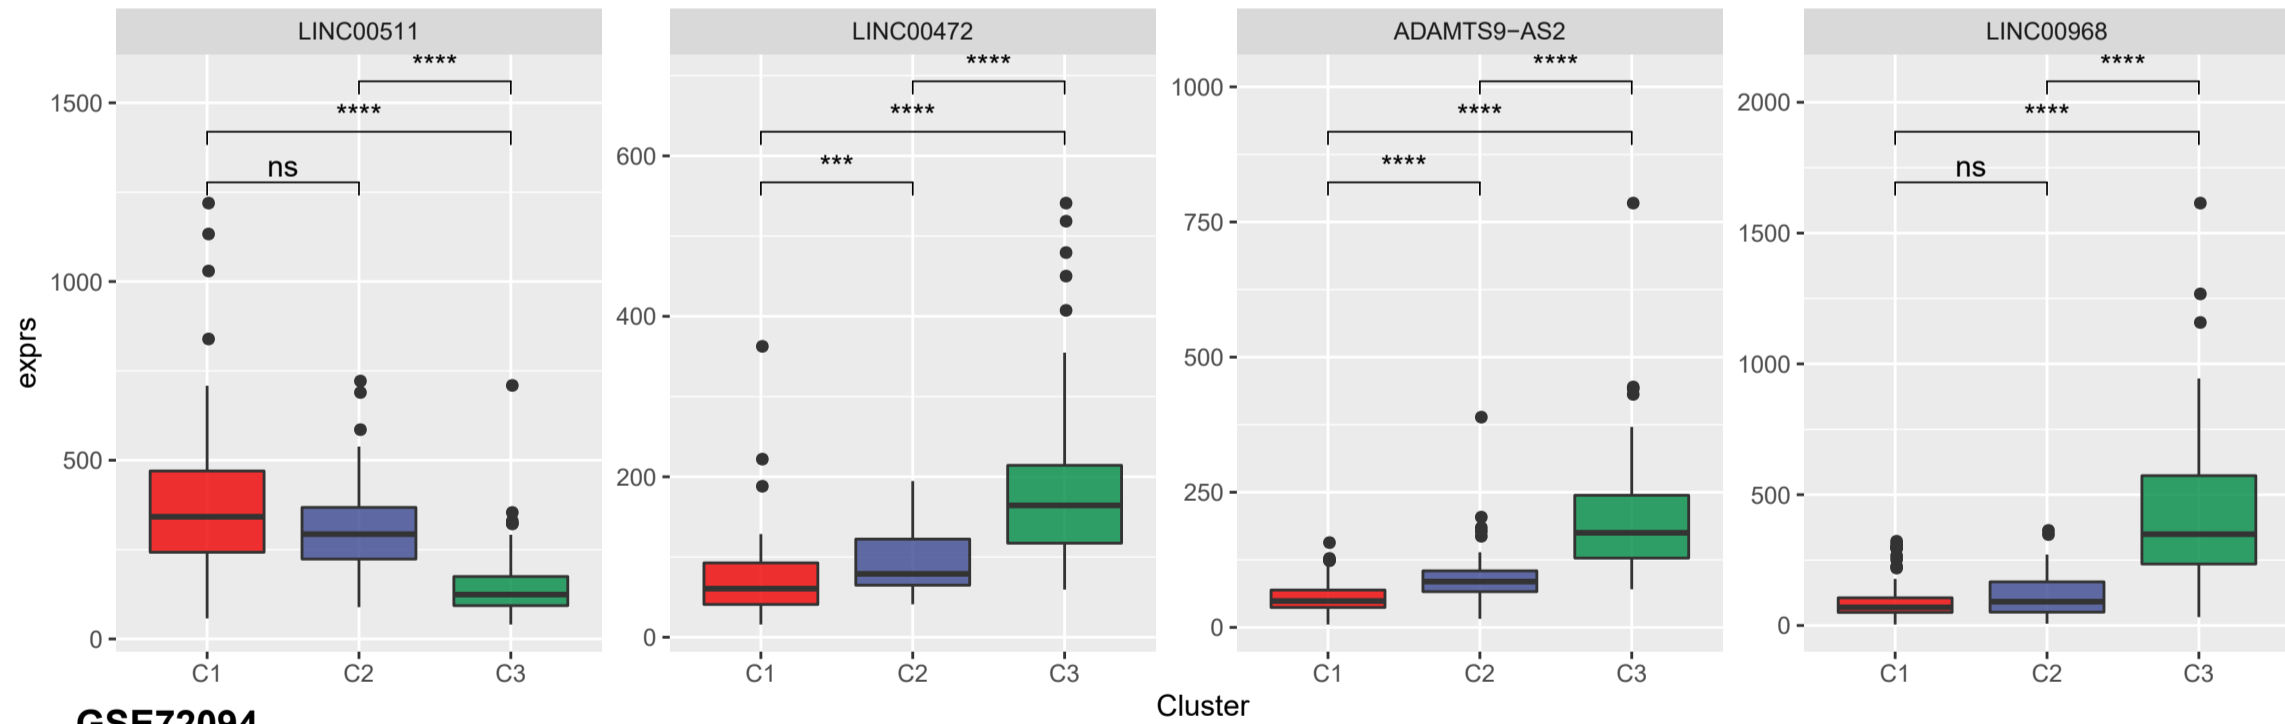

**GSE72094**

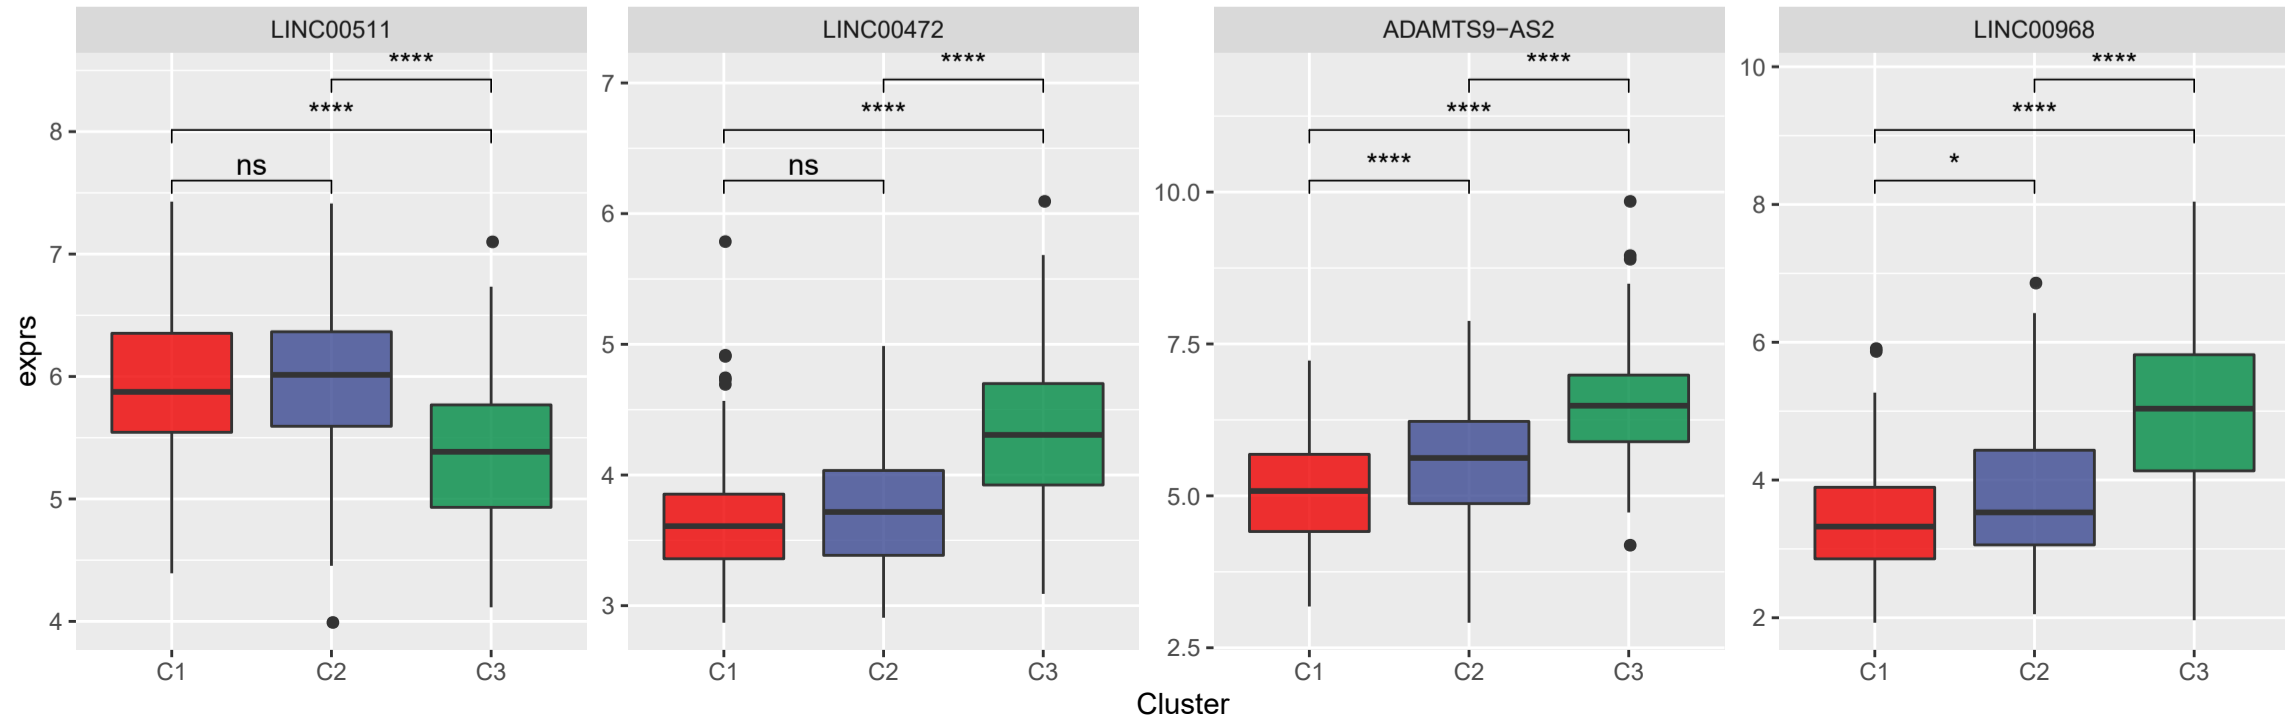

Supplement: f8 [file 7587398.f8.pdf]

$-\log_{10}(\text{anova p value})$

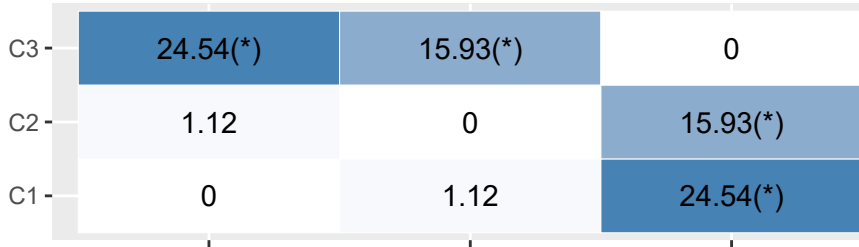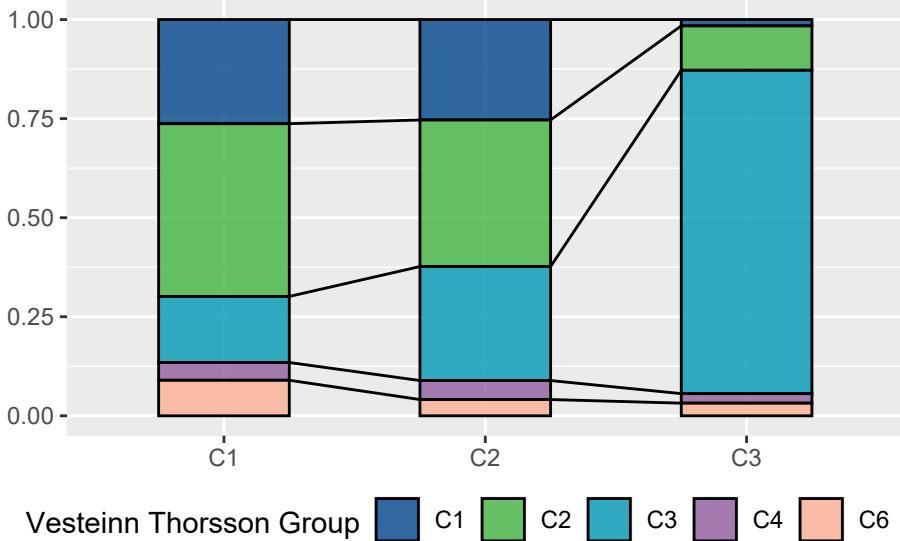

Supplement: f9 [file 7587398.f9.pdf]
